# Supplementary material
Source: publisher figshare collection journal article supplement (https://gsajournals.figshare.com/articles/dataset/_/9767519)
Supplement: Supplementary file 6 [file 1]

|         |          |          |          |           |
|---------|----------|----------|----------|-----------|
| WLC6439 | male     | wildtype | no       | no        |
| WLC6439 | male     | wildtype | no       | no        |
| WLC6439 | male     | wildtype | no       | no        |
| WLC6439 | male     | wildtype | no       | no        |
| WLC6439 | male     | wildtype | no       | no        |
| ISO8042 | male     | wildtype | no       | no        |
| ISO8042 | male     | melanic  | positive | positive  |
| ISO8043 | juvenile | melanic  | positive | positive  |
| ISO8046 | juvenile | wildtype | no       | no        |
| ISO8048 | male     | melanic  | positive | positive  |
| WLC4598 | female   | melanic  | positive | positive  |
| WLC4598 | female   | melanic  | positive | <b>no</b> |
| WLC4598 | female   | melanic  | positive | <b>no</b> |
| WLC4598 | female   | melanic  | positive | <b>no</b> |
| WLC4598 | female   | melanic  | positive | positive  |
| WLC6636 | female   | melanic  | positive | positive  |
| WLC6636 | female   | melanic  | positive | positive  |
| WLC6636 | female   | melanic  | positive | positive  |
| WLC6636 | female   | melanic  | positive | positive  |

Gray shading, melanic juveniles/males; yellow shading, wildtype males derived from inbred melanic strains (potential XX males); red shading, melanic females. Wildtype means non-melanic.
