# Supplementary material
Source: publisher figshare collection journal article supplement (https://gsajournals.figshare.com/articles/dataset/_/9767519)
Supplement: Supplementary file 7 [file 1]

A

gipc1\_aff ATGCCTCTGGGTCTGGGAAGAAGGAAGAAGGCGTCCCCGTTGGTGGAGAATGAGGAAGCG 60  
gipc1Y ATGCCTCTGGGTCTGGGAAGAAGGAAGAAGGCGTCCCCGTTGGTGGAGAATGAGGAAGCG 60  
gipc1X ATGCCTCTGGGTCTGGGAAGAAGGAAGAAGGCGTCCCCGTTGGTGGAGAATGAGGAAGCG 60  
\*\*\*\*\*

gipc1\_aff GAGCCCATCCGCGGTGGTCTCAACTTGCCGGGTATGGAGGGCTTGGATGGAGGAGTCGCT 120  
gipc1Y GAGCCCATCCGCGGTGGTCTCAACTTGCCGGGTATGGAGGGCTTGGATGGAGGAGTCGCT 120  
gipc1X GAGCCCATCCGCGGTGGTCTCAACTTGCCGGGTATGGAGGGCTTGGATGGAGGAGTCGCT 120  
\*\*\*\*\*

gipc1\_aff GGGGAGGCTGCAGGGTCTGACGGTCTTCCCTCCCCACCAAACAACATGAGACCCGGCTG 180  
gipc1Y GGGGAGGCTGCAGGGTCTGACGGTCTTCCCTCCCCACCAAACAACATGAGACCCGGCTG 180  
gipc1X GGGGAGGCTGCAGGGTCTGACGGTCTTCCCTCCCCACCAAACAACATGAGACCCGGCTG 180  
\*\*\*\*\*

gipc1\_aff ATTTTCCACACCCAACCTGGCTCACGGCAGCCCCACAGGCCGATTGAGGGCTTTAGCAAT 240  
gipc1Y ATTTTCCACACCCAACCTGGCTCACGGCAGCCCCACAGGCCGATTGAGGGCTTTAGCAAT 240  
gipc1X ATTTTCCACACCCAACCTGGCTCACGGCAGCCCCACAGGCCGATTGAGGGCTTTAGCAAT 240  
\*\*\*\*\*

gipc1\_aff GTGCGAGAGCTCTATGCCAAAATTGGAGAGGCCTTTGGCATCCCAGCATCTGAGGTTATG 300  
gipc1Y GTGCGAGAGCTCTATGCCAAAATTGGAGAGGCCTTTGGCATCCCAGCATCTGAGGTTATG 300  
gipc1X GTGCGAGAGCTCTATGCCAAAATTGGAGAGGCCTTTGGCATCCCAGCATCTGAGGTTATG 300  
\*\*\*\*\*

gipc1\_aff TTTTGCACGCTGAACACTCACAAGGTGGACATGGATAAACTTTTAGGGGGACAGATTGGG 360  
gipc1Y TTTTGCACGCTGAACACTCACAAGGTGGACATGGATAAACTTTTAGGGGGACAGATTGGG 360  
gipc1X TTTTGCACGCTGAACACTCACAAGGTGGACATGGATAAACTTTTAGGGGGACAGATTGGG 360  
\*\*\*\*\*

gipc1\_aff CTGAGGACTTCATTTTGTCCACATTAAGGCCAGAAGAAGGAAATAGAAATCTTCAA 420  
gipc1Y CTGAGGACTTCATTTTGTCCACATTAAGGCCAGAAGAAGGAAATAGAAATCTTCAA 420  
gipc1X CTGAGGACTTCATTTTGTCCACATTAAGGCCAGAAGAAGGAAATAGAAATCTTCAA 420  
\*\* \*\*\*\*\*

gipc1\_aff GGAGAAGATGCTTTAGGACTGACAATCACGTAACGGAGCAGGTTATGCTTTCATCAAG 480  
gipc1Y GGAGAAGATGCTTTAGGACTGACAATCACCGACAACGGAGCAGGTTATGCTTTCATCAAG 480  
gipc1X GGAGAAGATGCTTTAGGACTGACAATCACCGACAACGGAGCAGGTTATGCTTTCATCAAG 480  
\*\*\*\*\*

gipc1\_aff AGGATCCGGGAGGGGAGCATCATCCACCAATCCAGGTCATTAACGTTGGTGACATGATC 540  
gipc1Y AGGATCCGGGAGGGGAGCATCATCCACCAATCCAGGTCATTAACGTTGGTGACATGATC 540  
gipc1X AGGATCCGGGAGGGGAGCATCATCCACCAATCCAGGTCATTAACGTTGGTGACATGATC 540  
\*\*\*\*\*

gipc1\_aff GAGTCCATTAACGGCCATCGCCTCATTGGCTGTGACACTACGAAGTTGCCAAAATGCTG 600  
gipc1Y GAGTCCATTAACGGCCATCGCCTCATTGGCTGTGACACTACGAAGTTGCCAAAATGCTG 600  
gipc1X GAGTCCATTAACGGCCATCGCCTCATTGGCTGTGACACTACGAAGTTGCCAAAATGCTG 600  
\*\*\*\*\*

gipc1\_aff AAGGAGCTTCTAAGGGGAAAATGTTACCATCAAGCTTGTGGAGCCCCCAAAGCTTTT 660  
gipc1Y AAGGAGCTTCTAAGGGGAAAATGTTACCATCAAGCTTGTGGAGCCCCCAAAGCTTTT 660  
gipc1X AAGGAGCTTCTAAGGGGAAAATGTTACCATCAAGCTTGTGGAGCCCCCAAAGCTTTT 660  
\*\*\*\*\*

gipc1\_aff GATATGATTGGTCAGAGGTCGTGACGGCTCCAGGTCGGGCTCGGGGTCAGCTCGGGACG 720  
gipc1Y GATATGATTGGTCAGAGGTCGTGACGGCTCCAGGTCGGGCTCGGGGTCAGCTCGGGACG 720  
gipc1X GATATGATTGGTCAGAGGTCGTGACGGCTCCAGGTCGGGCTCGGGGTCAGCTCGGGACG 720  
\*\*\*\*\*

gipc1\_aff GGCAGAGGGACCCCTTCGTCTGCGCTCTAAAGGTCGCGCCACCGTGGAGGAGCTGCCTTCT 780  
gipc1Y GGCAGAGGGACCCCTTCGTCTGCGCTCTAAAGGTCGCGCCACCGTGGAGGAGCTGCCTTCT 780  
gipc1X GGCAGAGGGACCCCTTCGTCTGCGCTCTAAAGGTCGCGCCACCGTGGAGGAGCTGCCTTCT 780  
\*\*\*\*\*

gipc1\_aff GCATTTGAGGAAAAAGCGATTGAGAAGGTGGATGATTTGCTAGAGAGCTACATGGGCATC 840  
gipc1Y GCATTTGAGGAAAAAGCGATTGAGAAGGTGGATGATTTGCTAGAGAGCTACATGGGCATC 840  
gipc1X GCATTTGAGGAAAAAGCGATTGAGAAGGTGGATGATTTGCTAGAGAGCTACATGGGCATC 840  
\*\*\*\*\*

gipc1\_aff AGAGACAGCGAGCTGGCCGCCACTATGGTGGAGCTGGGCAAAGACAAGAAGAACCCAGAC 900  
gipc1Y AGAGACAGCGAACTGGCCGCCACTATGGTGGAGCTGGGCAAAGACAAGAAGAACCCAGAC 900  
gipc1X AGAGACAGCGAACTGGCCGCCACTATGGTGGAGCTGGGCAAAGACAAGAAGAACCCAGAC 900  
\*\*\*\*\*

gipc1\_aff GAGTTTGCTGAAGCTTTGGATGAGACTCTAGGAGACTTCGCCCTCCCGACGAGTTTGT 960  
gipc1Y GAGTTTGCTGAAGCTTTGGATGAGACTCTGGGAGACTTCGCCCTCCCGACGAGTTTGT 960  
gipc1X GAGTTTGCTGAAGCTTTGGATGAGACTCTGGGAGACTTCGCCCTCCCGACGAGTTTGT 960  
\*\*\*\*\*

gipc1\_aff TTCGACGTCTGGGGCGCCATCGGTGACGCGAAGGTTGGAC  
gipc1Y TTCGACGTCTGGGGCGCCATCGGTGACGCGAAGGTTGGACGTGTGTA 1008  
gipc1X TTCGACGTCTGGGGCGCCATCGGTGACGCGAAGGTTGGACGTGTGTA 1008  
\*\*\*\*\*

## B

gipc1\_aff MPLGLGRRKKASPLVENEAEPIRGGLNLPMEGLDGGVAGEAAGSDGLPPPPNNMRPRL 60  
gipc1Y MPLGLGRRKKASPLVENEAEPIRGGLNMPMEGLDGGVAGEAAGSDGLPPPPNNMRPRL 60  
gipc1X MPLGLGRRKKASPLVENEAEPIRGGLNLPMEGLDGGVAGEAAGSDGLPPPPNNMRPRL 60  
\*\*\*\*\*

gipc1\_aff IFHTQLAHGSPTRIEGFSNVRELYAKIGEAFGIPASEVMFCTLNTHKVDMDKLLGGQIG 120  
gipc1Y IFHTQLAHGSPTRIEGFSNVRELYAKIGEAFGIPASEVMFCTLNTHKVDMDKLLGGQIG 120  
gipc1X IFHTQLAHGSPTRIEGFSNVRELYAKIGEAFGIPASEVMFCTLNTHKVDMDKLLGGQIG 120  
\*\*\*\*\*

gipc1\_aff LEDFIFAHIKGQKKEIEIFKGEDALGLTITDNGAGYAFIKRIREGSIIHQIQVINVGDMI 180  
gipc1Y LEDFIFAHIKGQKKEIEIFKGEDALGLTITDNGAGYAFIKRIREGSIIHQIQVINVGDMI 180  
gipc1X LEDFIFAHIKGQKKEIEIFKGEDALGLTITDNGAGYAFIKRIREGSIIHQIQVINVGDMI 180  
\*\*\*\*\*

gipc1\_aff ESINGHRLIGCRHYEVAKMLKELPKGKMFITKLVEPLKAFDMIGQRSSGSRSGSGVQLGT 240  
gipc1Y ESINGHRLIGCRHYEVAKMLKELSKGKMFITKLVEPLKAFDMIGQRSSGSRSGSAVQLGT 240  
gipc1X ESINGHRLIGCRHYEVAKMLKELPKGKMFITKLVEPLKAFDMIGQRSSGSRSGSGVQLGT 240  
\*\*\*\*\*

gipc1\_aff GRGTLRLRSKGPATVEELPSAFEEKAIEKVDDLLESYMGIRDSELAATMVELGKDKKNPD 300  
gipc1Y GRGTLRLRSKGLATVDELPSAFEEKAIEKVDDLLESYMGIRDSELAATMVELGKDKKNPD 300  
gipc1X GRGTLRLRSKGPATVEELPSAFEEKAIEKVDDLLESYMGIRDSELAATMVELGKDKKNPD 300  
\*\*\*\*\*

gipc1\_aff EFAEALDETLGDFAFPDEFVFDVWGAIGDAKVG  
gipc1Y EFAEALDETLGDFAFPDEFVFDVWGAIGDAKVRV 335  
gipc1X EFAEALDETLGDFAFPDEFVFDVWGAIGDAKVRV 335  
\*\*\*\*\*

## C

sox9b\_aff ATGAATCTCCTCGACCTTACCTGAAGATGACAGAAGAACAGGAGAAATGTCATTTCAGAC 60  
sox9bX ATGAATCTCCTCGACCTTACCTGAAGATGACAGAAGAACAGGAGAAATGTCATTTCAGAC 60  
sox9bY ATGAATCTCCTCGACCTTACCTGAAGATGACAGAAGAACAGGAGAAATGTCATTTCAGAC 60  
\*\*\*\*\*

sox9b\_aff GCTCCGAGCCCCAGCATGTCTGAAGACTCAGCGGGCTCGCCGTGCCCGTCCGGCTCCGGT 120  
sox9bX GCTCCGAGCCCCAGCATGTCTGAAGACTCAGCGGGCTCGCCGTGCCCGTCCGGCTCCGGT 120  
sox9bY GCTCCGAGCCCCAGCATGTCTGAAGACTCAGCGGGCTCGCCGTGCCCGTCCGGCTCCGGT 120  
\*\*\*\*\*

sox9b\_aff TCGGACACCGAGAACACCCGGCCGTCCGACAACACCTCCTCAGGGGACCGGACTACAAG 180  
sox9bX TCGGACACCGAGAACACCCGGCCGTCCGACAACACCTCCTCAGGGGACCGGACTACAAG 180  
sox9bY TCGGACACCGAGAACACCCGGCCGTCCGACAACACCTCCTCAGGGGACCGGACTACAAG 180  
\*\*\*\*\*

sox9b\_aff AAGGAAGCGGAGGAAGAGAAGTTCCCGGTGTGCATCAGAGATGCGGTGTCCAGGTGCTG 240  
sox9bX AAGGAAGCGGAGGAAGAGAAGTTCCCGGTGTGCATCAGAGATGCGGTGTCCAGGTGCTG 240  
sox9bY AAGGAAGCGGAGGAAGAGAAGTTCCCGGTGTGCATCAGAGATGCGGTGTCCAGGTGCTG 240  
\*\*\*\*\*

sox9b\_aff AAGGGCTATGACTGGACGCTCGTACCCATGCCGGTGC GCGTCAACGGCTCCAGCAAGAGC 300  
sox9bX AAGGGCTATGACTGGACGCTCGTACCCATGCCGGTGC GCGTCAACGGCTCCAGCAAGAGC 300  
sox9bY AAGGGCTATGACTGGACGCTCGTACCCATGCCGGTGC GCGTCAACGGCTCCAGCAAGAGC 300  
\*\*\*\*\*

sox9b\_aff AAACCACACGTTAAGAGACCCATGAACGCCCTTCATGGTTTGGGCTCAGGCGGCGGGAGG 360  
sox9bX AAACCACACGTTAAGAGACCCATGAACGCCCTTCATGGTTTGGGCTCAGGCGGCGGGAGG 360  
sox9bY AAACCACACGTTAAGAGACCCATGAACGCCCTTCATGGTTTGGGCTCAGGCGGCGGGAGG 360  
\*\*\*\*\*

sox9b\_aff AAGCTGGCCGATCAGTATCCGCATCTGCACAACGCAGAACTCAGCAAAACCCCTGGGAAAA 420  
sox9bX AAGCTGGCCGATCAGTATCCGCATCTGCACAACGCAGAACTCAGCAAAACCCCTGGGAAAA 420  
sox9bY AAGTTGGCCGATCAGTATCCGCATCTGCACAACGCAGAACTCAGCAAAACCCCTGGGAAAA 420  
\*\*\* \*\*\*\*\*

sox9b\_aff CTTTGGAGGCTTCTCAATGAGGTGGAGAAGCGCCGTTTGTGGAGGAAGCTGAACGCCTG 480  
sox9bX CTTTGGAGGCTTCTCAATGAGGTGGAGAAGCGCCGTTTGTGGAGGAAGCTGAACGCCTG 480  
sox9bY CTTTGGAGGCTTCTCAATGAGGTGGAGAAGCGCCGTTTGTGGAGGAAGCTGAACGCCTG 480  
\*\*\*\*\*

sox9b\_aff AGAGTGCAGCACAAAGGATCACCCGACTATAAATATCAACCGAGGCGGAGGAAATCT 540  
sox9bX AGAGTGCAGCACAAAGGATCACCCGACTACAAATATCAACCGAGGCGGAGGAAATCT 540  
sox9bY AGAGTGCAGCACAAAGGATCACCCGACTATAAATATCAACCGAGGCGGAGGAAATCT 540  
\*\*\*\*\*

sox9b\_aff GTTAAAGAATGGGCAAAATGAATCCGAGGATGGCGAACAGACGCACATCTCTCCGAACGCT 600  
sox9bX GTTAAAGAATGGGCAAAATGAATCCGAGGATGGCGAACAGACGCACATCTCTCCGAACGCT 600  
sox9bY GTTAAAGAATGGGCAAAATGAATCCGAGGATGGCGAACAGACGCACATCTCTCCGAACGCT 600  
\*\*\*\*\*

sox9b\_aff ATATTCAAGGCGCTGCAGCAAGCAGACTCTCCTGCGTCCAGCATGGGCGAGGTGCACTCT 660  
sox9bX ATATTCAAGGCGCTGCAGCAAGCAGACTCTCCTGCGTCCAGCATGGGCGAGGTGCACTCT 660  
sox9bY ATATTCAAGGCGCTGCAGCAAGCAGACTCTCCTGCGTCCAGCATGGGCGAGGTGCACTCT 660  
\*\*\*\*\*

sox9b\_aff CCGGGAGAACATTCGGTTCAGTACAGGGACCACCAACACCCCGACAACCCCAAAGACA 720  
sox9bX CCGGGAGAACATTCGGTTCAGTACAGGGACCACCAACACCCCGACAACCCCAAAGACA 720  
sox9bY CCGGGAGAACATTCGGTTCAGTACAGGGACCACCAACACCCCGACAACCCCAAAGACA 720  
\*\*\*\*\*

sox9b\_aff GATCTTTCCTCCAGCAAAGCTGACCTGAAGCGTGAGGGCCGCCCATTCAGAGGGCAGC 780  
sox9bX GATCTTTCCTCCAGCAAAGCTGACCTGAAGCGTGAGGGCCGCCCATTCAGAGGGCAGC 780  
sox9bY GATCTTTCCTCCAGCAAAGCTGACCTGAAGCGTGAGGGCCGCCCATTCAGAGGGCAGC 780  
\*\*\*\*\*

sox9b\_aff AGTCGGCAGCTCAACATAGACTTTGGAGCTGTGGACATTTGGTGTAGCTTAGCAGCGAAGTC 840  
sox9bX AGTCGGCAGCTCAACATAGACTTTGGAGCTGTGGACATTTGGTGTAGCTTAGCAGCGAAGTC 840  
sox9bY AGTCGGCAGCTCAACATAGACTTTGGAGCTGTGGACATTTGGTGTAGCTTAGCTGCGAAGTC 840  
\*\*\*\*\*

sox9b\_aff ATCTCCAACATTTGGAGCTTTGATGTTGATGAGTTCGACCAGTACCTGCCACCTCACAGC 900  
sox9bX ATCTCCAACATTTGGAGCTTTGATGTTGATGAGTTCGACCAGTACCTGCCACCTCACAGC 900  
sox9bY ATCTCCAACATTTGGAGCTTTGATGTTGATGAGTTCGACCAGTACCTGCCACCTCACAGC 900  
\*\*\*\*\*

sox9b\_aff CACGCTGGGGTTGCTGGTCCAGCCAGGCTGGCTACACAGGCAGCTACGGTATTAGCACC 960  
sox9bX CACGCTGGGGTTGCTGGTCCAGCCAGGCTGGCTACACAGGCAGCTACGGTATTAGCACC 960  
sox9bY CACGCTGGGGTTGCTGGTCCAGCCAGGCTGGCTACACAGGCAGCTACGGTATTAGCACC 960  
\*\*\*\*\*

sox9b\_aff TCCTCAGTCAGTCAGGGAGCCGGTGTGGGAGCTCATGCTTGGATGTCCAAGCAGCAGCAG 1020  
sox9bX TCCTCAGTCAGTCAGGGAGCCGGTGTGGGAGCTCATGCTTGGATGTCCAAGCAGCAGCAG 1020  
sox9bY TCCTCAGTCAGTCAGGGAGCCAGTGTGGGAGCTCATGCTTGGATGTCCAAGCAGCAGCAG 1020  
\*\*\*\*\*

sox9b\_aff CAGCAGCATACTCTGACCAACCTTGGTGGAGCAGGAGAGCAAGGTCAACAGGGCCAGCAG  
sox9bX CAGCAGCATACTCTGACCAACCTTGGTGGAGCAGGAGAGCAAGGTCAACAGGGCCAGCAG 1080  
sox9bY CAGCAGCATACTCTGACCAACCTTGGTGGAGCAGGAGAGCAAGGTCAACAGGGCCAGCAG 1080  
\*\*\*\*\*

sox9b\_aff AGAACCACCCAGATCAAGACGGAGCAGCTCAGCCCGAGCCACTACAGTGACCAACAGGGA 1140  
sox9bX AGAACCACCCAGATCAAGACGGAGCAGCTCAGCCCGAGCCACTACAGTGACCAACAGGGA 1140  
sox9bY AGAACCACCCAGATCAAGACGGAGCAGCTCAGCCCGAGCCACTACAGTGACCAACAGGGA 1140  
\*\*\*\*\*

sox9b\_aff TCCCCGAGCACATCACCTATGGCTCATTCAACTACAGCACTACAGCCCTCTTCTTAT 1200  
sox9bX TCCCCGAGCACATCACCTATGGCTCATTCAACTACAGCACTACAGCCCTCTTCTTAT 1200  
sox9bY TCCCCGAGCACATCACCTATGGCTCATTCAACTACAGCACTACAGCCCTCTTCTTAT 1200  
\*\*\*\*\*

sox9b\_aff CCGTCCATCACAAGAGCACAATATGACTATTGAGAACACCAGAGCAGTGCCAACTCTTAC 1260  
sox9bX CCGTCCATCACAAGAGCACAATATGACTATTGAGAACACCAGAGCAGTGCCAACTCTTAC 1260  
sox9bY CCGTCCATCACAAGAGCACAATATGACTATTGAGAACACCAGAGCAGTGCCAACTCTTAC 1260  
\*\*\*\*\*

sox9b\_aff TACAGCCACGCAGCTGGCCAAGGTTCCAGCCTGTACTCCACCTCAGCTACATGAGCCCC 1320  
sox9bX TACAGCCACGCAGCTGGCCAAGGTTCCAGCCTGTACTCCACCTCAGCTACATGAGCCCC 1320  
sox9bY TACAGCCACGCAGCTGGCCAAGGTTCCAGCCTGTACTCCACCTCAGCTACATGAGCCCC 1320  
\*\*\*\*\*

sox9b\_aff AGCCAGAGGCCGATGTACACCCCAATAGCCGACAGCACTGGGGTGCCCTCTGTGCCGCAG 1380  
sox9bX AGCCAGAGGCCGATGTACACCCCAATAGCCGACAGCACTGGGGTGCCCTCTGTGCCGCAG 1380  
sox9bY AGCCAGAGGCCGATGTACACCCCAATAGCCGACAGCACTGGGGTGCCCTCTGTGCCGCAG 1380  
\*\*\*\*\*

sox9b\_aff ACCCAGAGTCCACAGCACTGGGAGCAGCAGCGATTACACACAACCTGTCCAGGCCCTGA 1440  
sox9bX ACCCAGAGTCCACAGCACTGGGAGCAGCAGCGATTACACACAACCTGTCCAGGCCCTGA 1440  
sox9bY ACCCAGAGTCCACAGCACTGGGAGCAGCAGCGATTACACACAACCTGTCCAGGCCCTGA 1440  
\*\*\*\*\*

## D

sox9b\_aff MNLLDPYLKMTTEEQEKCHSDAPSPMSSEDSAGSPSPSGSGSDTENTRPSDNHLLRGPDYK 60  
sox9bX MNLLDPYLKMTTEEQEKCHSDAPSPMSSEDSAGSPSPSGSGSDTENTRPSDNHLLRGPDYK 60  
sox9bY MNLLDPYLKMTTEEQEKCHSDAPSPMSSEDSAGSPSPSGSGSDTENTRPSDNYLLRGPDYK 60  
\*\*\*\*\*

sox9b\_aff KEGEEEEKFPVCIIRDAVSQVLKGYDWTLPMPVVRVNGSSKSKPHVKRPMNAFMVWAQAARR 120  
sox9bX KEGEEEEKFPVCIIRDAVSQVLKGYDWTLPMPVVRVNGSSKSKPHVKRPMNAFMVWAQAARR 120  
sox9bY KEGEEEEKFPVCIIRDAVSQVLKGYDWTLPMPVVRVNGSSKSKPHVKRPMNAFMVWAQAARR 120  
\*\*\*\*\*

sox9b\_aff KLADQYPHLHNAELSKTLGKLWRLNNEVEKRPFVEEAERLRVQHKDHPDYKYQPRRRKS 180  
sox9bX KLADQYPHLHNAELSKTLGKLWRLNNEVEKRPFVEEAERLRVQHKDHPDYKYQPRRRKS 180  
sox9bY KLADQYPHLHNAELSKTLGKLWRLNNEVEKRPFVEEAERLRVQHKDHPDYKYQPRRRKS 180  
\*\*\*\*\*

sox9b\_aff VKNGQNESEDGEQTHISPNAI FKALQQADSPASSMGEVHSPGEHSGQSQGPPTPPTPKT 240  
sox9bX VKNGQNESEDGEQTHISPNAI FKALQQADSPASSMGEVHSPGEHSGQSQGPPTPPTPKT 240  
sox9bY VKNGQNESEDGEQTHISPNAI FKALQQADSPASSMGEVHSPGEHSGQSQGPPTPPTPKT 240  
\*\*\*\*\*

sox9b\_aff DLSSSKADLKREGRPIQEGSSRQLNIDFGAVDIGELSSSEVISNIGSFDVDEFDQYLP PHS 300  
sox9bX DLSSSKADLKREGRPIQEGSSRQLNIDFGAVDIGELSSSEVISNIGSFDVDEFDQYLP PHS 300  
sox9bY DLSSSKADLKREGRPIQEGSSRQLNIDFGAVDIGELSSCEVISNIGSFDVDEFDQYLP PHS 300  
\*\*\*\*\*

sox9b\_aff HAGVAGPAQAGYTGSYGI STSSVSQGAGVGAHAWMSKQQQQHTLTNLGGAGEQQQQGQ 360  
sox9bX HAGVAGPAQAGYTGSYGI STSSVSQGAGVGAHAWMSKQQQQHTLTNLGGAGEQQQQGQ 360  
sox9bY HAGVAGPAQAGYTGSYGI STSSVSQGASVGAHAWMSKQQQQHTLTNLGGAEQQQQGQ 360  
\*\*\*\*\*

```

sox9b_aff RTTQIKTEQLSPSHYSDQQGSPQHI TYGSFNLQH YSPSSYPSITRAQYDYSEHQSSANSY 420
sox9bX RTTQIKTEQLSPSHYSDQQGSPQHI TYGSFNLQH YSPSSYPSITRAQYDYSEHQSSANSY 420
sox9bY RTTQIKTEQLSPSHYSDQQGSPQHI TYGSFNLQH YSPSSYPSITRAQYDYSEHQSSANSY 420
*****

sox9b_aff YSHAAGQGSSLYSTFSYMSPSQRPMYTP IADSTGVPSVPQTHSPQHWEQQPIYTQLSRP 479
sox9bX YSHAAGQGSSLYSTFSYMSPSQRPMYTP IADSTGVPSVPQTHSPQHWEQQPIYTQLSRP 479
sox9bY YSHAAGQGSSLYSTFSYMSPSQRPMYTP IADSTGVPSVPQTHSPQYWEQQPIYTQLSRP 479
*****

```

**Figure S4** Alignments of male *G. holbrooki* and *G. affinis* *gipc1* and *sox9b* alleles.

Alignment of (A) *gipc1* ORF and (B) predicted protein sequences and (C) *sox9b* ORF and (D) putative protein sequences from the *G. holbrooki* X and Y chromosome and *G. affinis*. The *G. affinis* sequences were derived from the *G. affinis* genome (HOFFBERG *et al.* 2018). The sequences were aligned with Clustal Omega. Based on the distribution of SNPs, the respective alleles from the X and from *G. affinis* appear to correspond to the ancestral state of *Gambusia*. (B) Orange, GH1 domain; light blue, PDZ domain; red, GH2 domain. (D) Green, DIM domain; dark blue, HMG domain; brown, K2 domain; violet, TA domain. Accession numbers of *G. affinis* sequences: *sox9b* ORF, NHOQ01002125.1:61568-61995,62336-62583,62831-63594; *sox9b* protein sequence, PWA19450.1; *gipc1* ORF, NHOQ01002357.1: 1316372-1316665,1316740-1316925,1317062-1317242,1318142-1318254,1318339-1318420, 1318497-1318640,1318740-1318819,1319648-1319671 (shortened as probably not correctly assembled (does not end with stop codon)); *gipc1* protein sequence, PWA17858.1 (shortened in accordance with ORF sequence).

## Reference

Hoffberg, S. L., N. J. Troendle, T. C. Glenn, O. Mahmud, S. Louha *et al.*, 2018 A high-quality reference genome for the invasive mosquitofish *Gambusia affinis* using a Chicago Library. G3 (Bethesda) 8: 1855-1861.
